# Supplementary material
Source: Springer Nature journal article supplement (https://www.springermedizin.de/resource/supplementary/12935_2006_147_MOESM9_ESM.pdf/9541184)

# MEF 12 (1) Cells

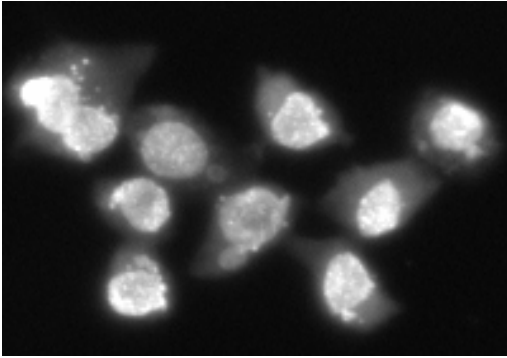

**A** 10-40

20 microns  
magnification: 10x

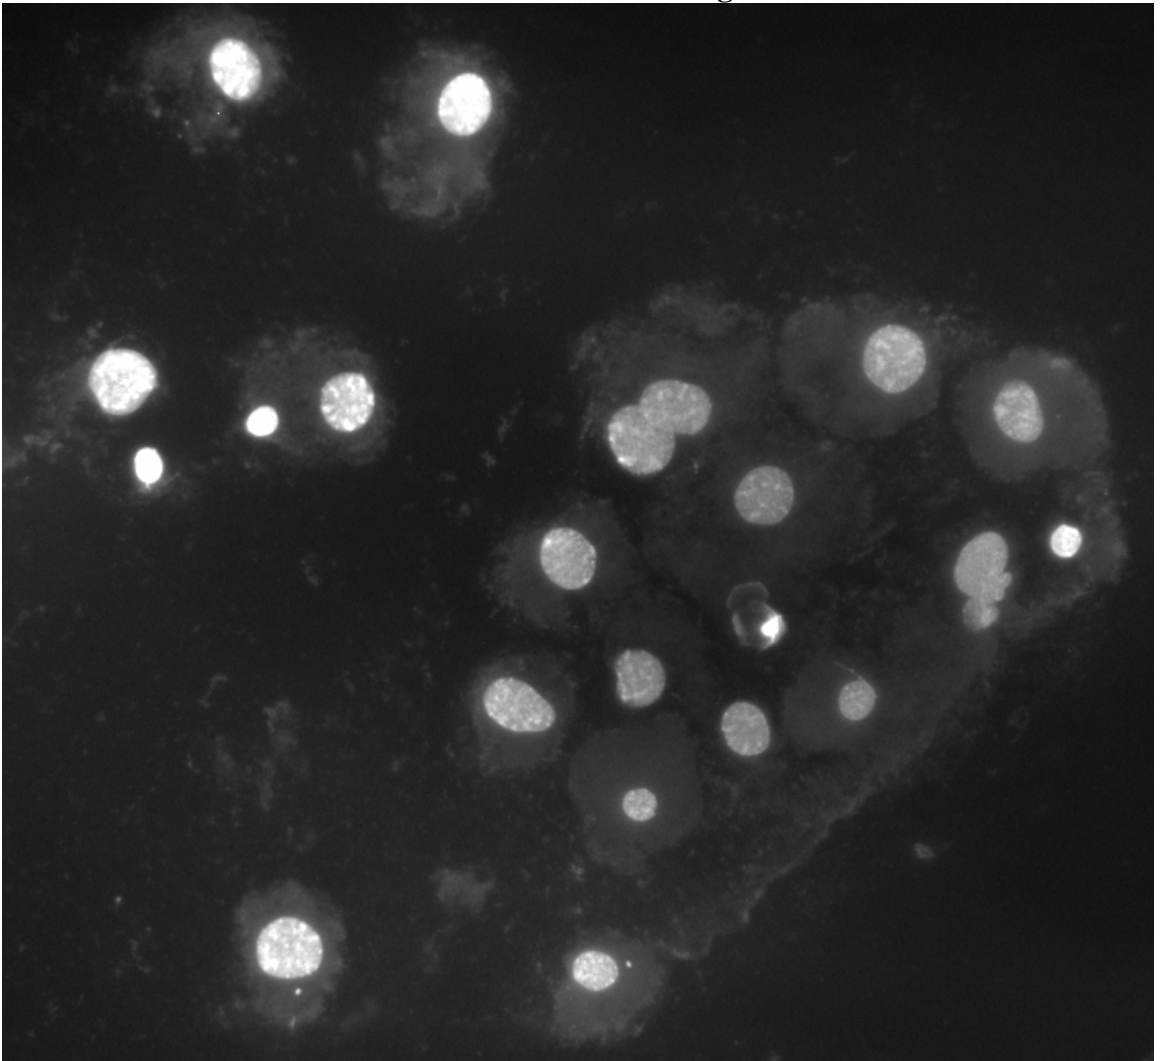

**B**

**C-0**

Supplement: MOESM9 [file 9541184]
